# Supplementary material for: Carabid Beetles (Coleoptera) as Indicators of Sustainability in Agroecosystems: A Systematic Review
Source: MDPI journal article supplement (doi:10.3390/su15053936), 2023-02-21
Supplement: s1 [file s1]

Archive with 3 entries (3 files):
- Makwela M_PRISMA_2020_abstract_checklist_Table S2.pdf
- Makwela M_PRISMA_2020_checklist_Table S3.pdf
- sustainability-2084671-Supplemetary material_Table S1.pdf
